# Supplementary material for: The Predictors and Outcomes of Functional Mitral Stenosis following Surgical Mitral Valve Repair: A Retrospective Analysis
Source: MDPI journal article supplement (doi:10.3390/jcdd10110470), 2023-11-19
Supplement: s1 [file s1]

**Supplementary Table S1.** Reasons for patients who did not undergo follow-up echocardiography.

| Reason                                                                                | Patient number |
|---------------------------------------------------------------------------------------|----------------|
| Hospital mortality                                                                    | 4              |
| Death occurring after discharge but before the first follow-up echocardiography       | 5              |
| Follow-up echocardiography performed at another hospital due to transportation issues | 3              |
| Undergoing a heart transplant prior to the first follow-up echocardiography.          | 1              |
